# Supplementary material for: The global, regional, and national burden and quality of care index (QCI) of colorectal cancer; a global burden of disease systematic analysis 1990–2019
Source: PubMed Central journal article supplement (PMC9022854; doi:10.1371/journal.pone.0263403), 2022-04-21
Supplement: pone.0263403.s006.pdf [file pone.0263403.s006.pdf]

1990

Female

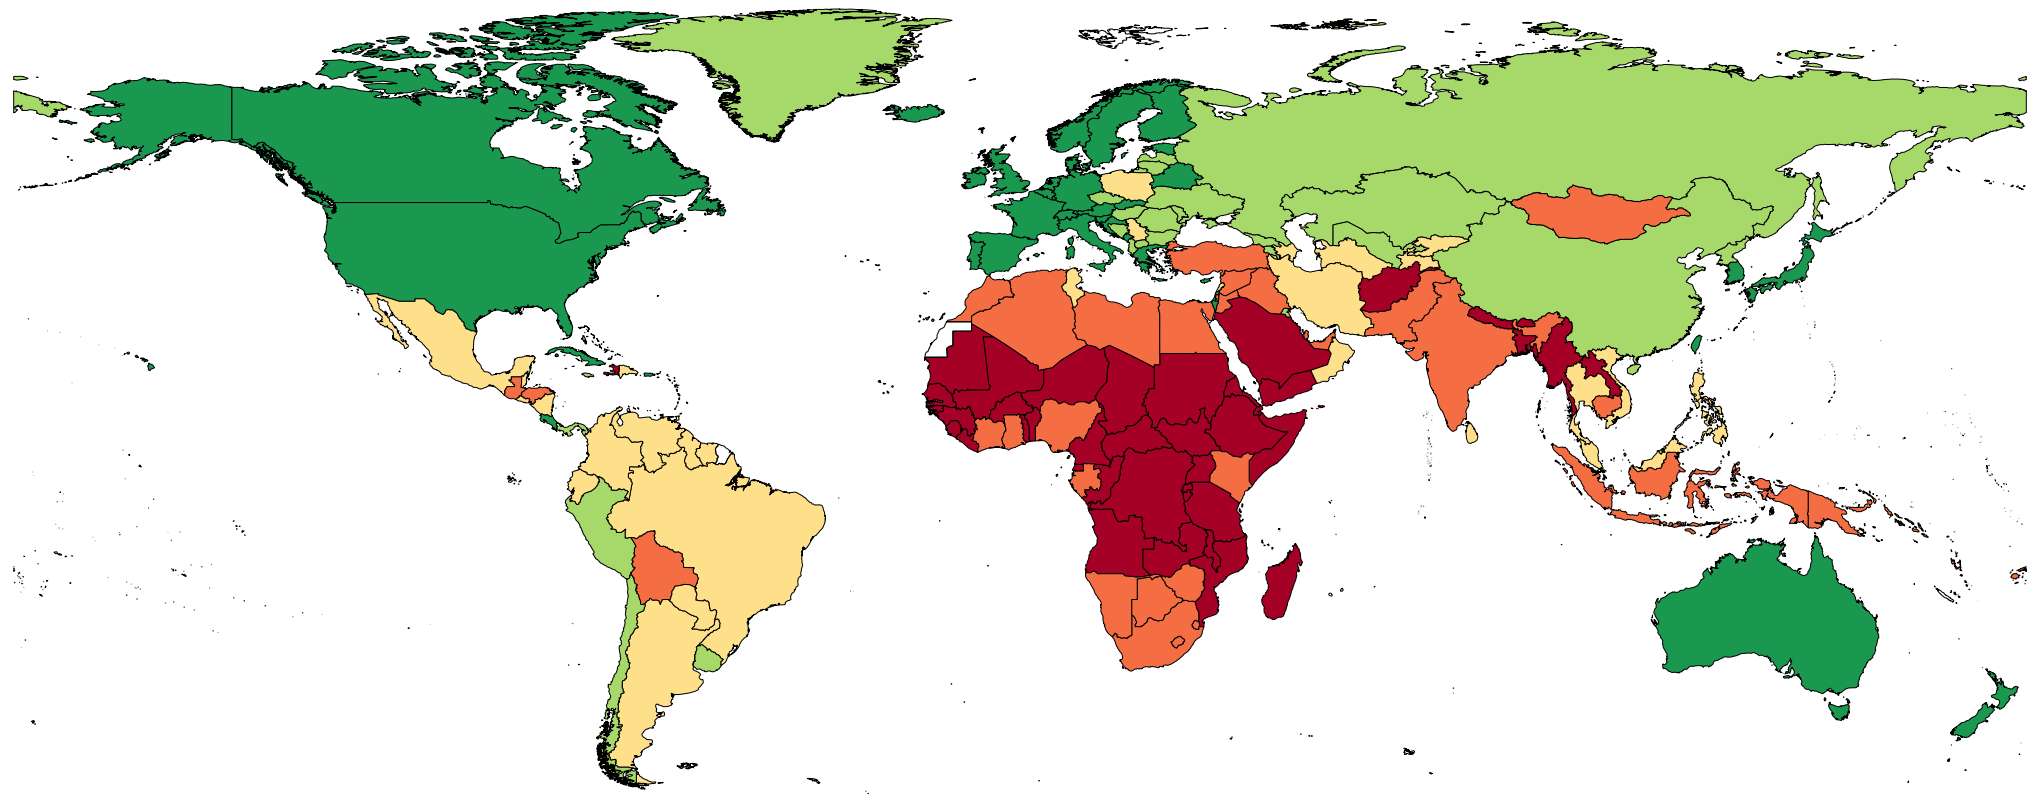

Male

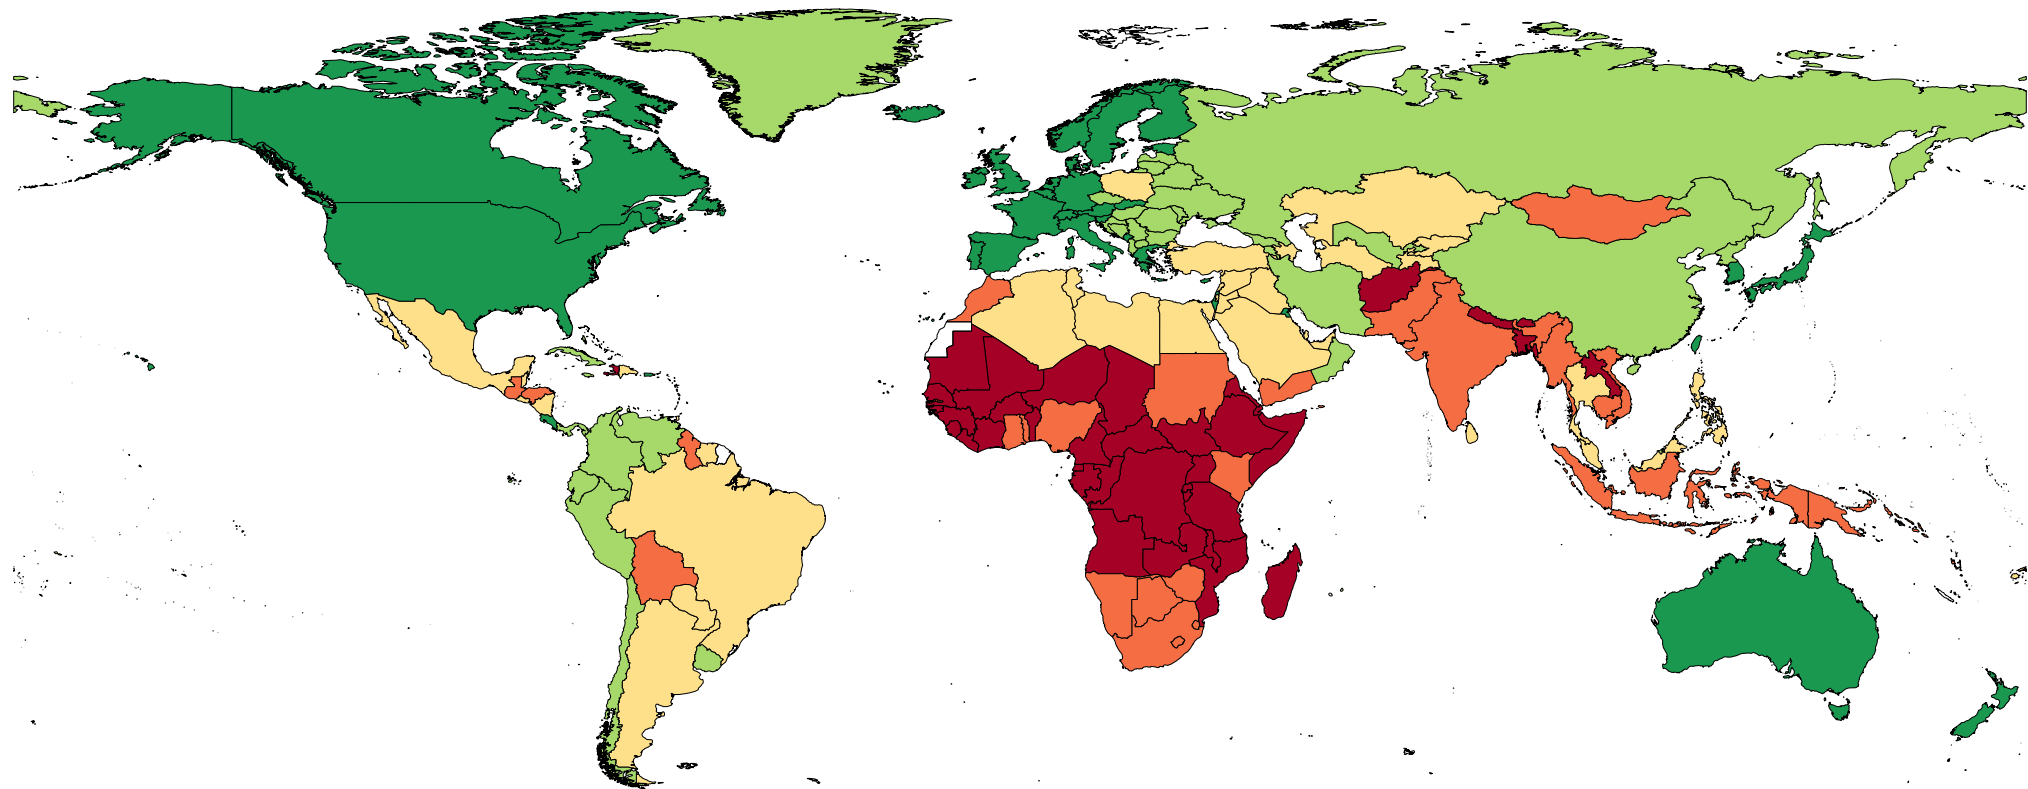

Age-standardized QCI (%)

- < 12.5
- [12.5 to 27.6)
- [27.6 to 40.7)
- [40.7 to 58.0)
- ≥ 58.0
