# Supplementary material for: The global, regional, and national burden and quality of care index (QCI) of colorectal cancer; a global burden of disease systematic analysis 1990–2019
Source: PubMed Central journal article supplement (PMC9022854; doi:10.1371/journal.pone.0263403), 2022-04-21
Supplement: pone.0263403.s007.pdf [file pone.0263403.s007.pdf]

2019

Female

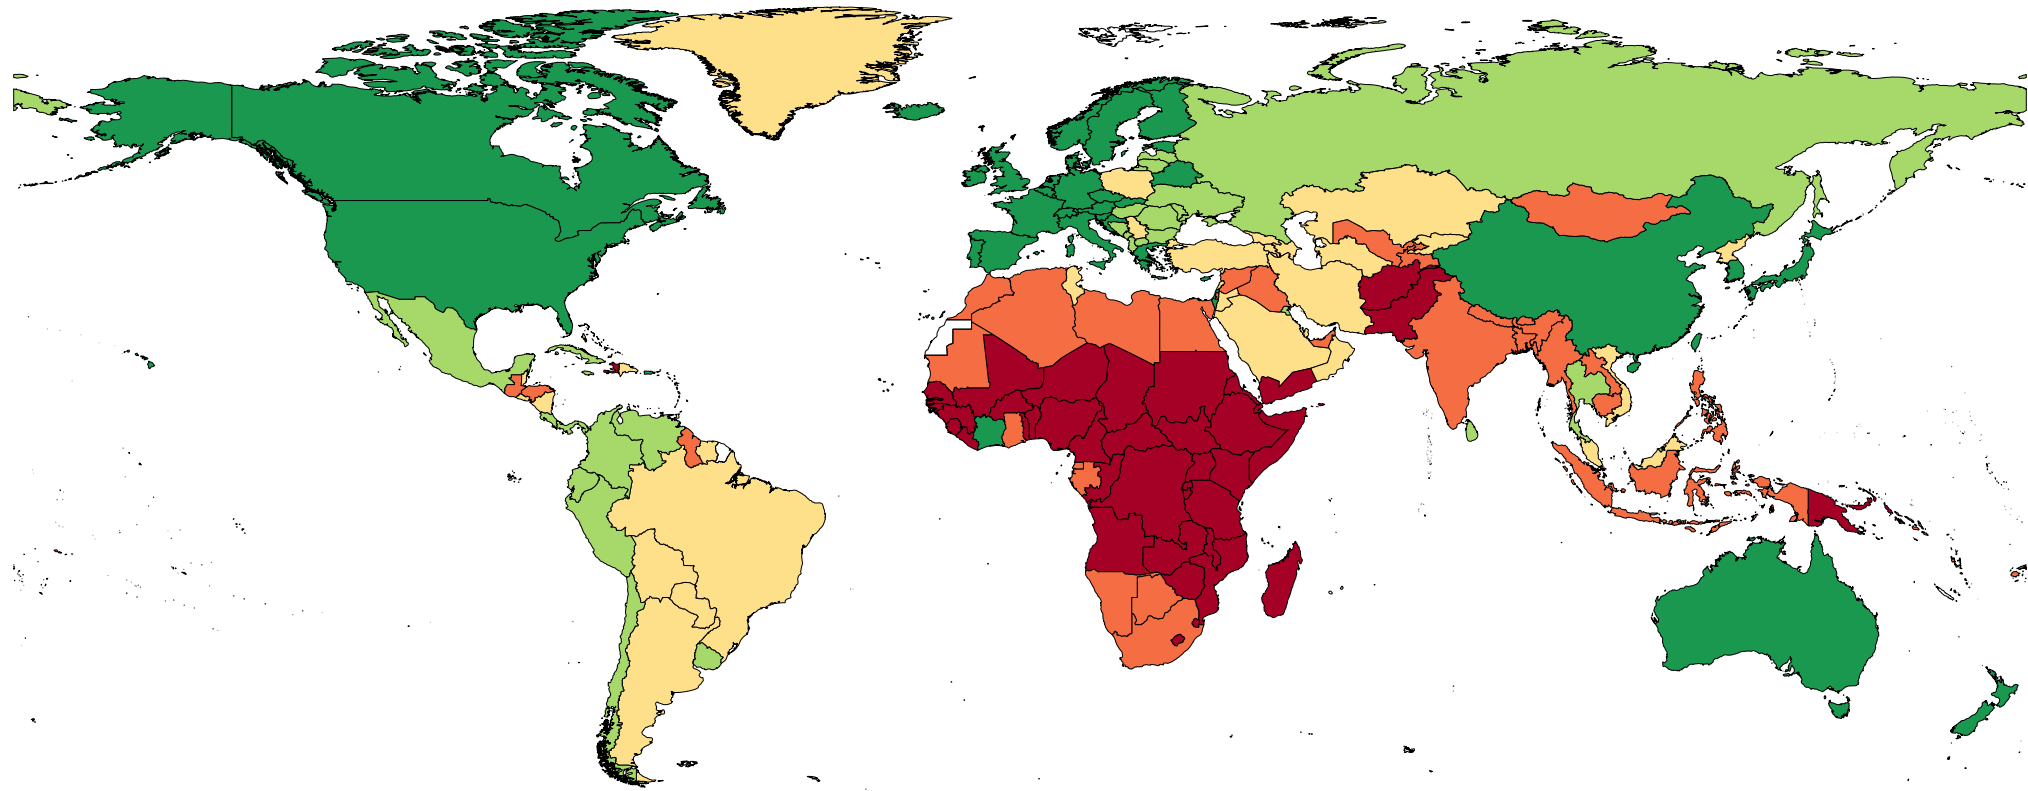

Male

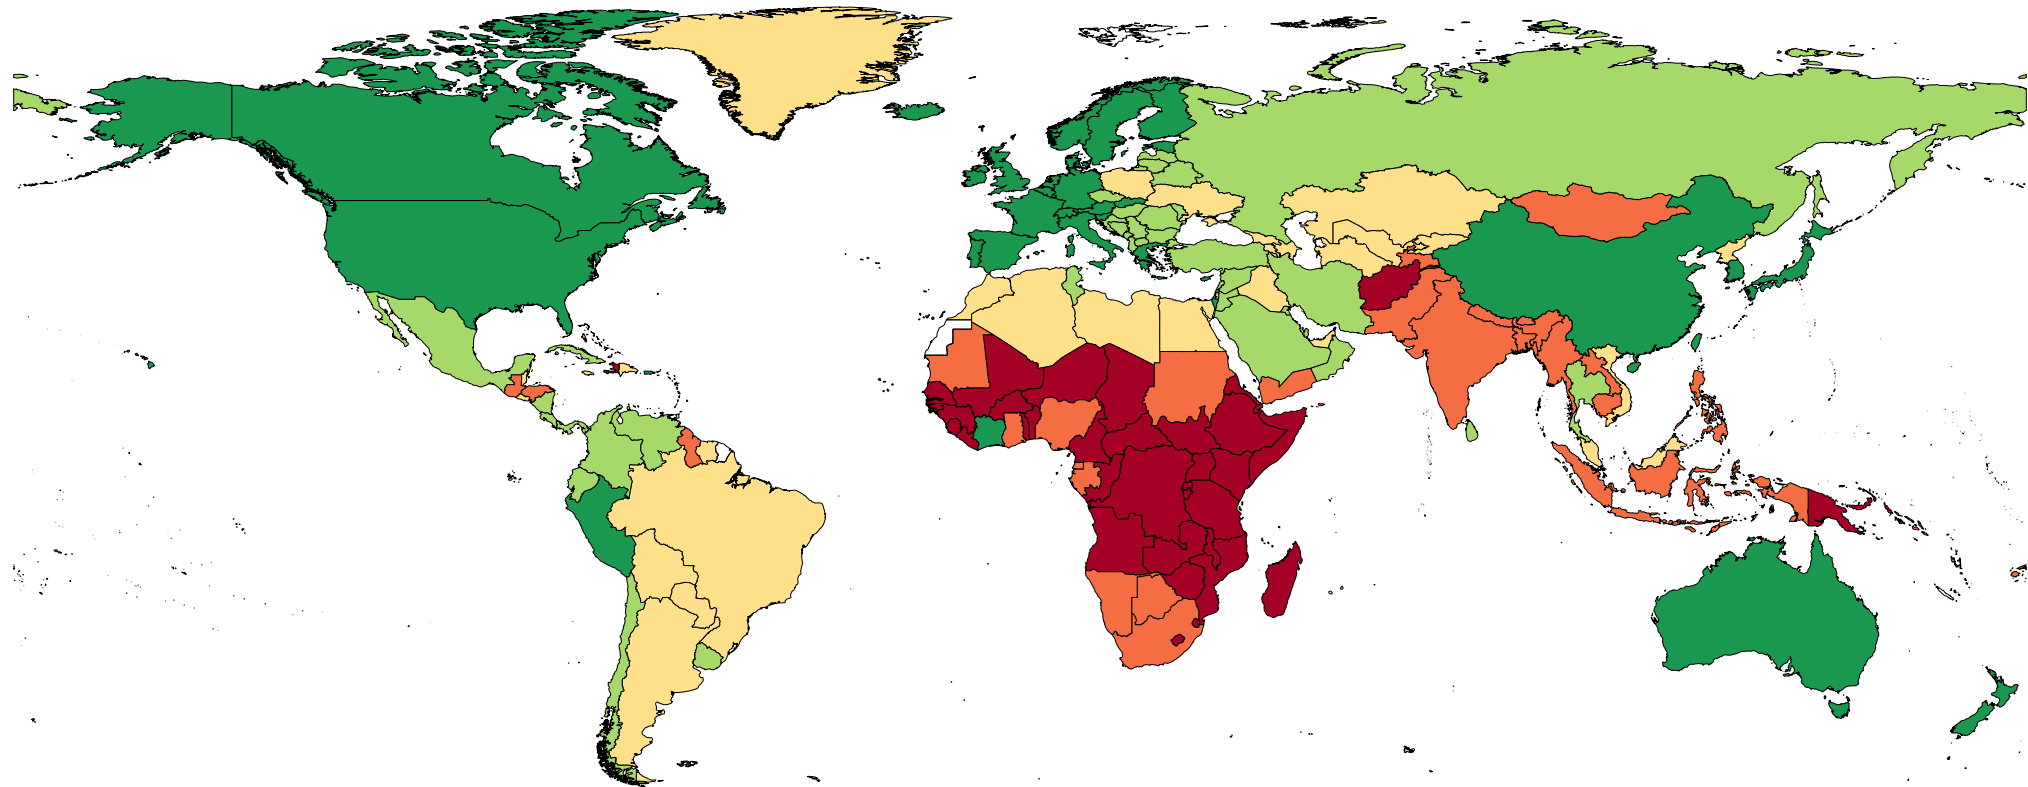

Age-standardized QCI (%)

- < 22.8
- [22.8 to 44.1)
- [44.1 to 60.2)
- [60.2 to 78.4)
- $\geq 78.4$
